# Supplementary material for: Positional Information Generated by Spatially Distributed Signaling Cascades
Source: PLoS Comput Biol. 2009 Mar 20;5(3):e1000330. doi: 10.1371/journal.pcbi.1000330 (PMC2654021; doi:10.1371/journal.pcbi.1000330)
Supplement: Text S1 — Exact solutions for small concentrations. (0.05 MB DOC) [file pcbi.1000330.s001.doc]

**Text S1**

## Exact solutions for small concentrations

It can be shown that Eq. (9) has a solution of the form where is a polynomial of order corresponding to the th-level. If we write as , where is the coefficient of the *m*th order term in the solution corresponding to the *n*th level of the cascade, then the relation between the coefficients is given by

(A1)

In the case >1 the approximation remains valid near the left boundary and using the boundary condition there we obtain an additional equation for the zero order coefficient in the polynomial at the different -levels, , which reads . For <1 the approximation is not valid near the boundary *x*=0 and the coefficients cannot be exactly calculated.

We can use (A1) to obtain successively an explicit solution for the different levels to Eq. (9). Considering, for the next five levels we have

(A2)
